# Supplementary material for: Revealing the Structure Formation on Polyglycerol Citrate Polymers – an Environmentally Friendly Polyester as a Coating Material
Source: Preprints.org preprint supplement (doi:10.20944/preprints202308.0454.v1), 2023-08-04
Supplement: Supplementary file 1 [file supplementary]

***Supplementary Material**

Revealing the structure formation on polyglycerol citrate polymers – an environmentally friendly polyester as a coating material

Amanda S. Girotoa,b*, Stella F. Vallea, Roger Borgesa, Tatiana S. Ribeiroc, Luiz A. Colnagoa, Nicolai D. Jablonowskib*, Caue Ribeiroa*, Luiz H. C. Mattosoa

*a Embrapa Instrumentation, XV de Novembro Street, 1452, 13560-970, São Carlos, SP, Brazil*

*bForschungszentrum Jülich GmbH, Institute of Bio- and Geosciences, IBG-2: Plant Sciences, 52425 Jülich, Germany*

*cDepartment of Natural Science, Mathematics and Education, Federal University of São Carlos, Anhanguera, Km 174, Araras - SP 13604-900, SP, Brazil.*

*Corresponding authors: a.soares.giroto@fz-juelich.de & asgiroto@gmail.com; n.d.jablonowski@fz-juelich.de; caue.ribeiro@embrapa.br.


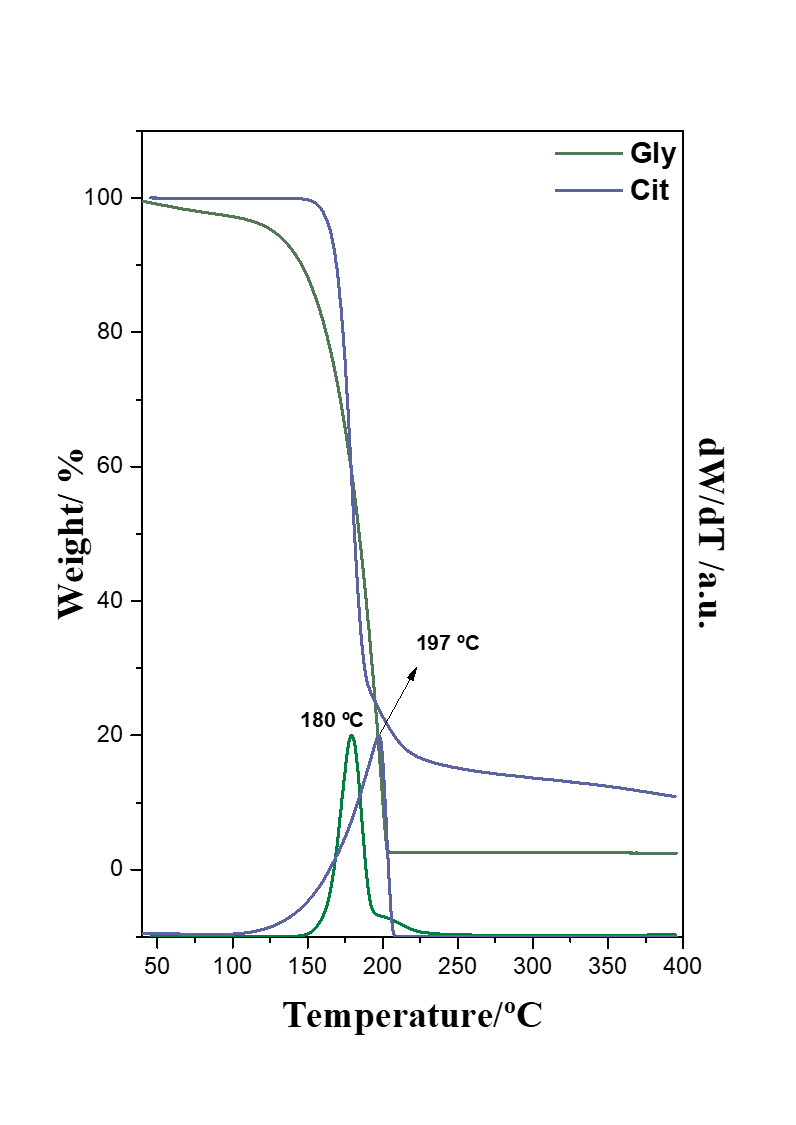


Figure S1. Thermogravimetric analyses of pristine Cit and Gly.


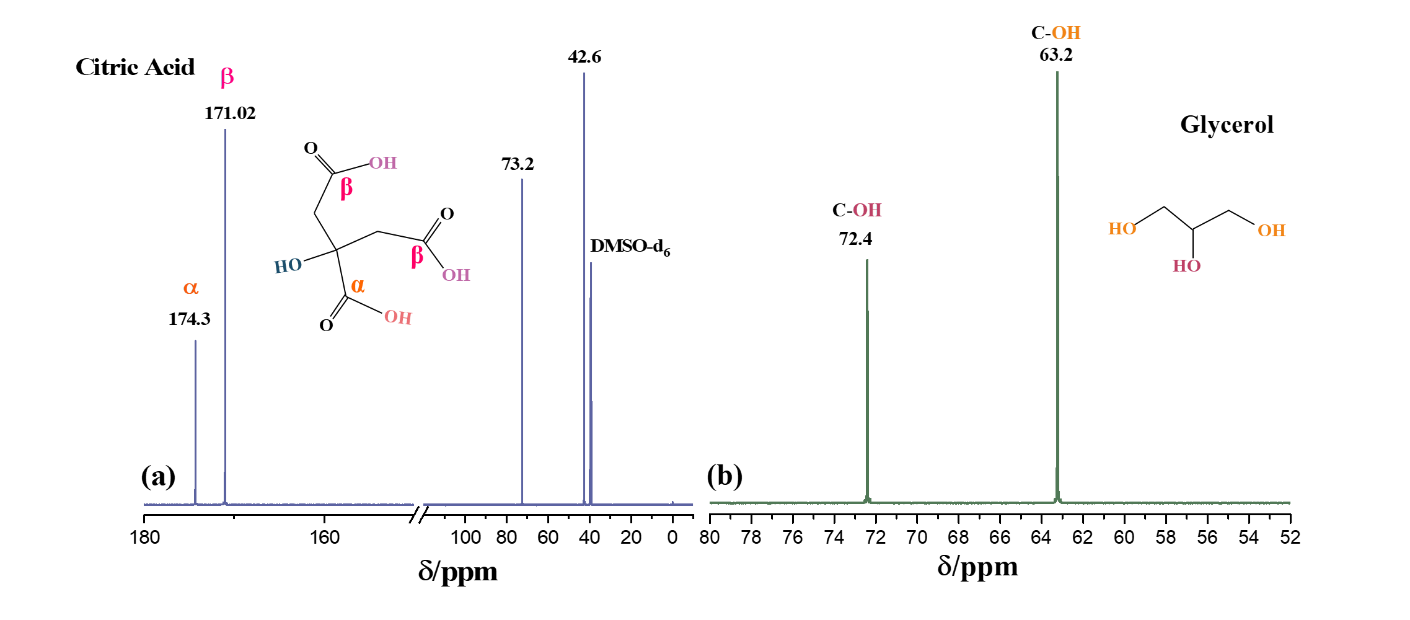


Figure S2. 13C NMR of pristine citric acid (a) and glycerol (b).


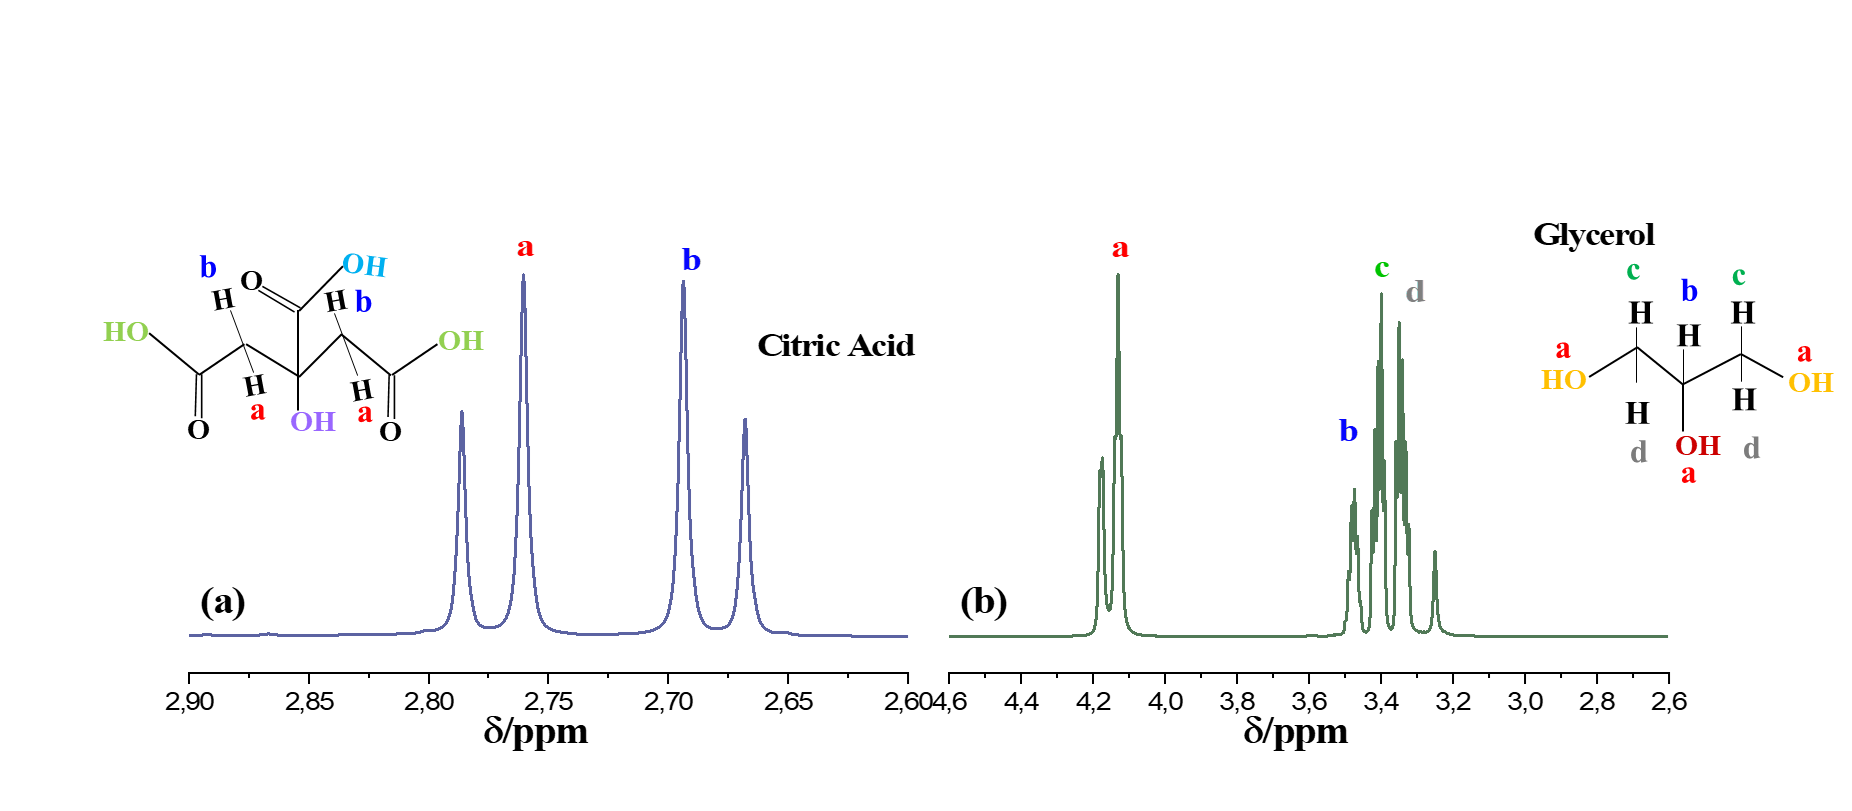


Figure S3. 1H NMR of pristine citric acid (a) and glycerol (b).


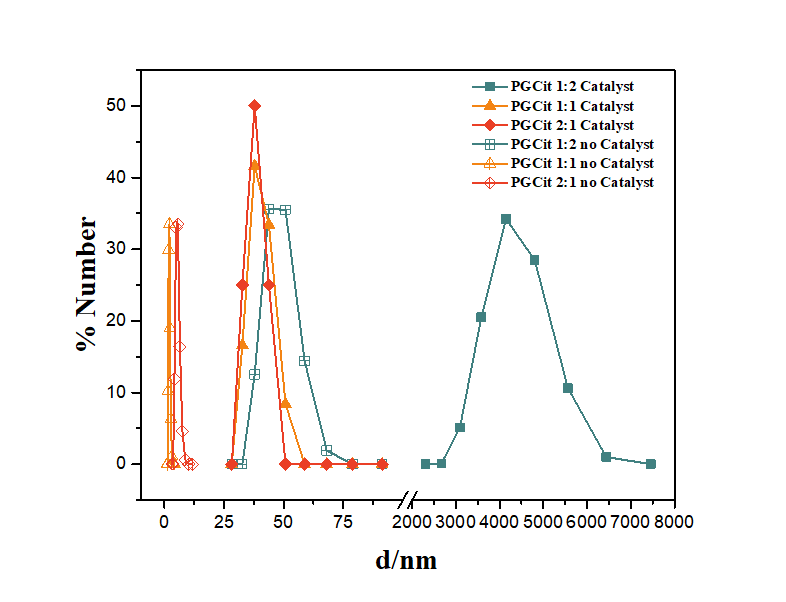


Figure S4. Hydrodynamic size distribution of PGCit in pH 7.
